# Supplementary material
Source: Springer Nature journal article supplement (https://www.springermedizin.de/resource/supplementary/13229_2013_106_MOESM10_ESM.pdf/9676186)

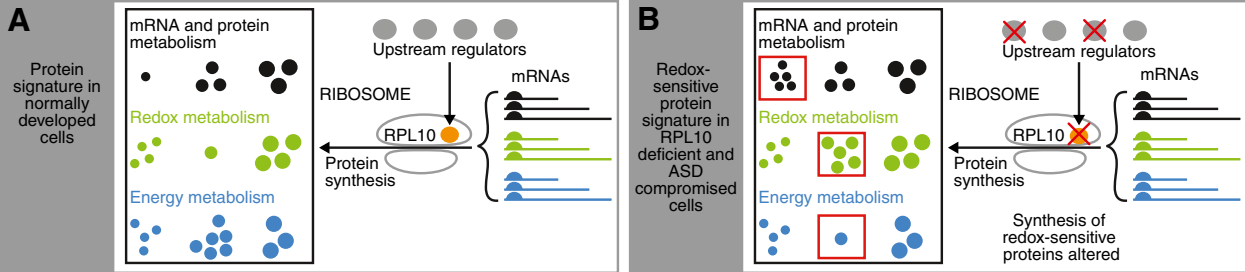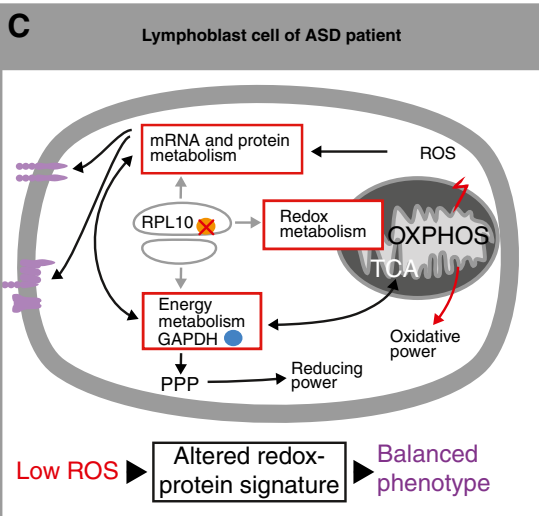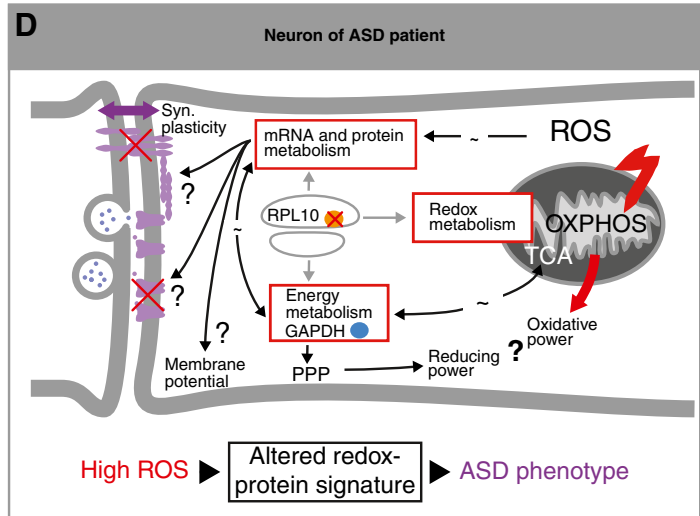

Supplement: MOESM10 [file 9676186]
